# Supplementary material
Source: publisher site journal article supplement (https://www.dovepress.com/get_supplementary_file.php?f=329341.docx)
Supplement: Supplementary file 1 [file get_supplementary_file.php]

**Supplementary Information**

**Enhancing of Nanocatalyst-Driven Chemodynaminc Therapy for Endometrial Cancer Cells through Inhibition of PINK1/Parkin-Mediated Mitophagy**

Xiaodi Gong1,*, Xin Pu4,*, Jing Wang1, Linlin Yang1, Yunxia Cui1, Lijuan Li1,Xiao Sun1, Jichang Liu4, Jingfeng Bai3, Yudong Wang1,2


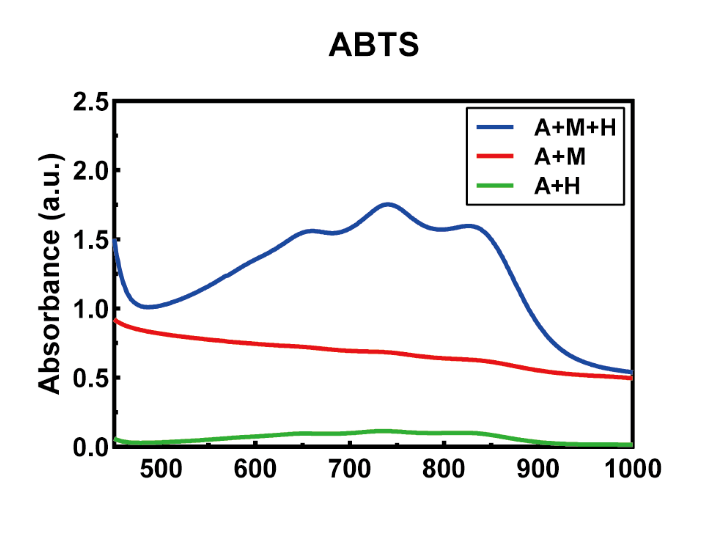


**Figure S1** UV-vis absorption of ABTS at 500-900 nm of ABTS/H2O2, ABTS/nMIL-100(Fe) and ABTS/H2O2/nMIL-100(Fe). [A]=ABTS 0.2×10-3 M, [H]= H2O2 50×10-6 M, [M]=nMIL-100(Fe) ×100 μg ml-1.


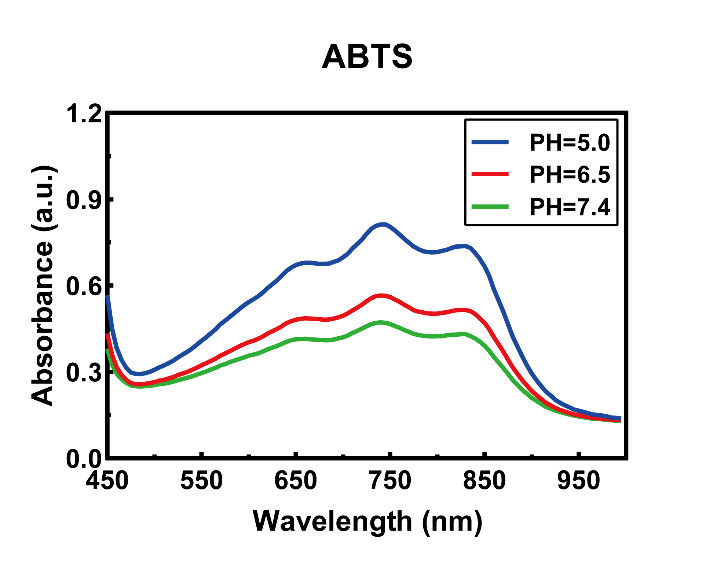


**Figure S2** PH values-dependent catalytic activity of nMIL-100(Fe) to ABTS. ABTS 0.2×10-3 M, nMIL-100(Fe) 100 μg ml-1, H2O2 50×10-6 M.


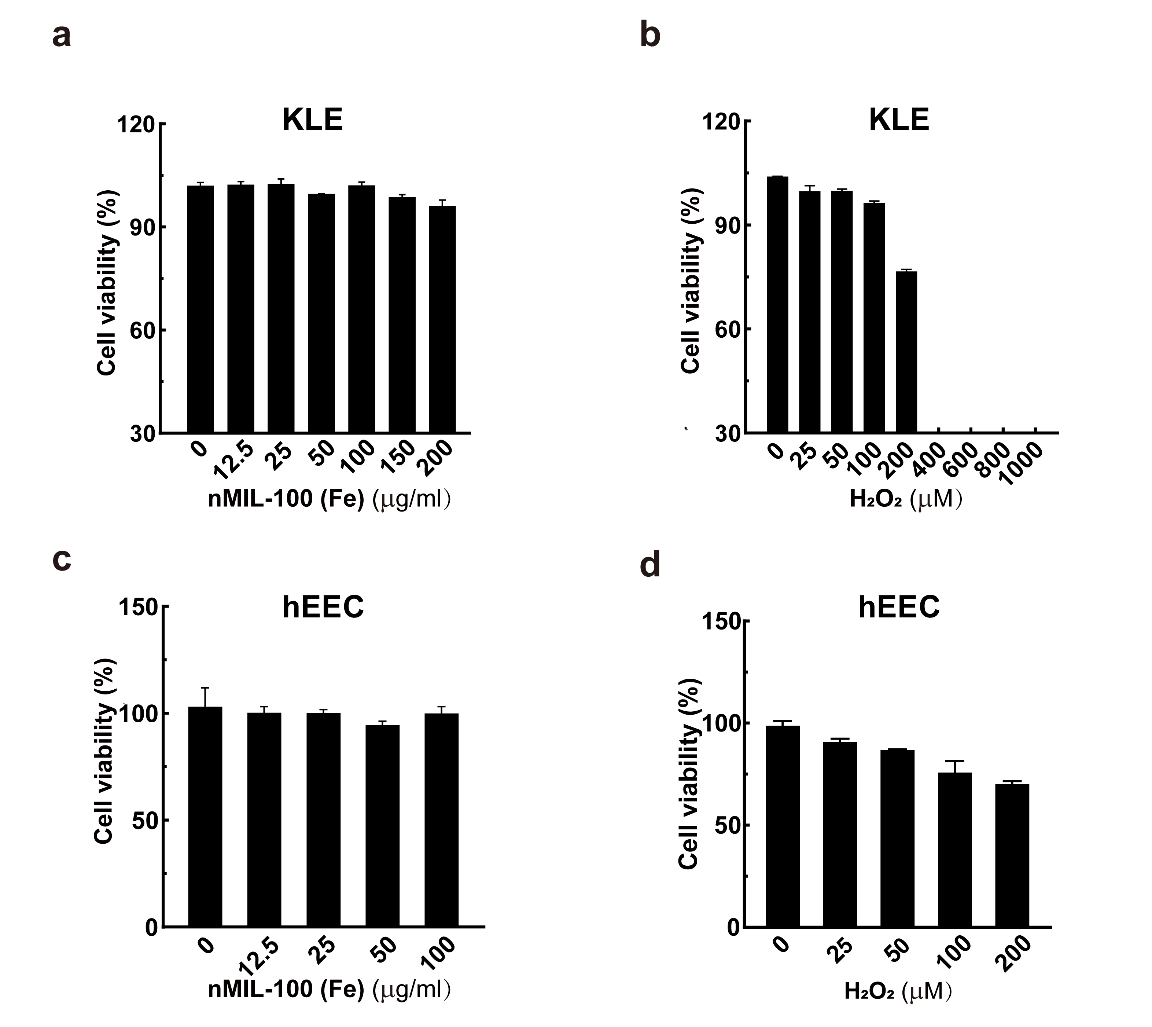


**Figure S3** (a-d) Cell viability detection of KLE and hEEC cells by CCK-8 assay after different administrations including nMIL-100(Fe) or H2O2 for 24 h.


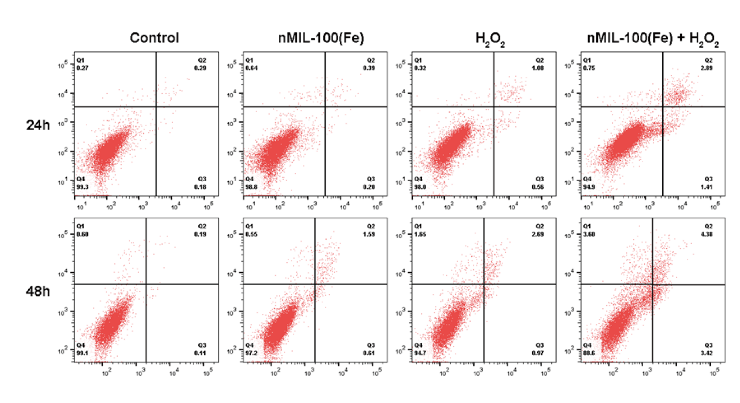


**Figure S4** Flow cytometry analysis of KLE cells apoptosis after different treatments including 100 μg ml-1 nMIL-100(Fe) alone, 50×10-6 M H2O2 alone and a combination of both for 24 h and 48 h respectively.


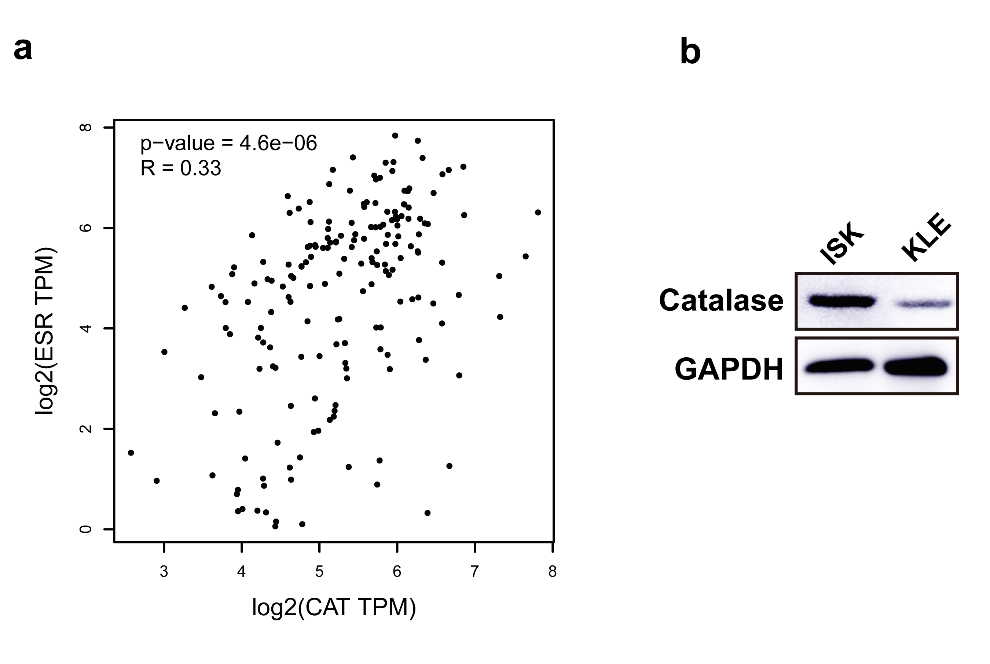


**Figure S5** (a) Bivariate correlation analysis of CAT and ESR expression in human Uterine Corpus Endometrial Carcinoma from the TCGA database in GEPIA website (<http://gepia2.cancer-pku.cn/#correlation>) (R= 0.33, P = 4.6e-06). (b) The basic expression of Catalase in ISK and KLE cells by western blotting with GAPDH as a protein loading control.


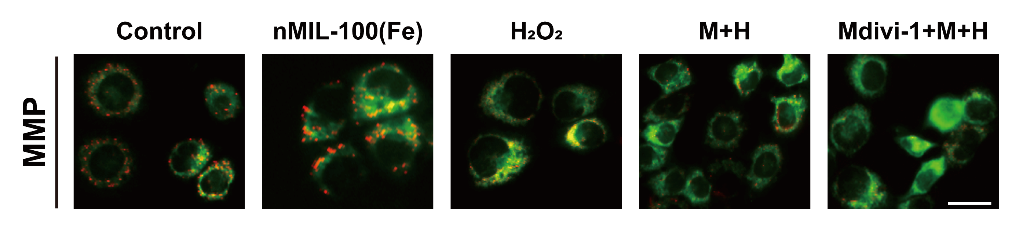


**Figure S6** Immunofluorescence analysis of the mitochondrial membrane potential (MMP) ΔΨm (JC-1 red/green fluorescence intensity ratio）after different treatment including control, 100 μg ml-1 nMIL-100(Fe) alone, 50×10-6 M H2O2 alone, a combination of both or a pretreatment of Mdivi-1 (5×10-6 M, 1 h) before the both additions for 24 h (scale bar is 10 µm).


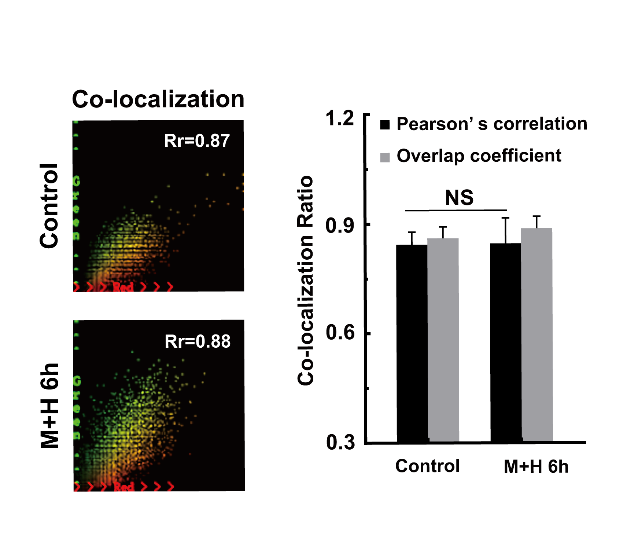


**Figure S7** The colocalization between green Parkin and red mitochondria tracker in ISK cells after M+H treatment for 6 h compared with control groups by Pearson's coefficient and Manders overlap coefficients analysis. M+H: 100 μg ml-1 nMIL-100(Fe) + 50×10-6 M H2O2.
